# Supplementary material for: Lanthanide homometallic and d–f heterometallic MOFs from the same tripodal ligand: structural comparison, one photon (OP) vs. two photon (TP) luminescence and selective guest adsorption behavior
Source: Royal Society of Chemistry journal article supplement (doi:10.1039/c2jm00001f), 2012-01-01
Supplement: c2jm00001f.pdf [file c2jm00001f.pdf]

Supporting information:

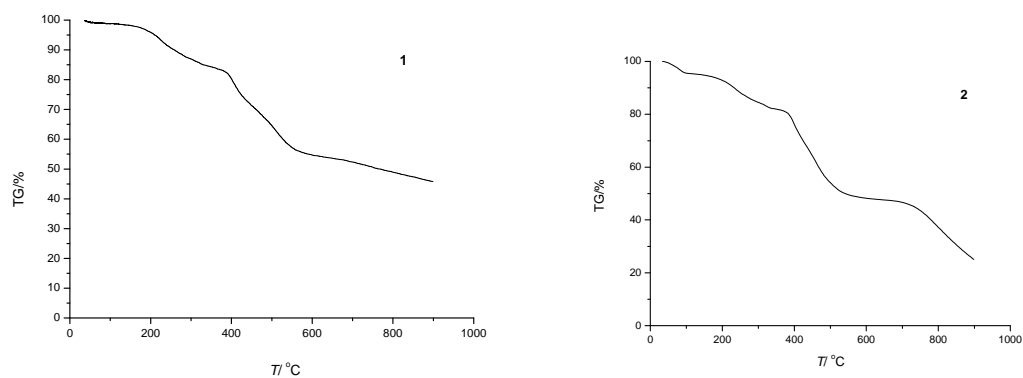

Fig. S1 TG curves of complexes **1** and **2**.

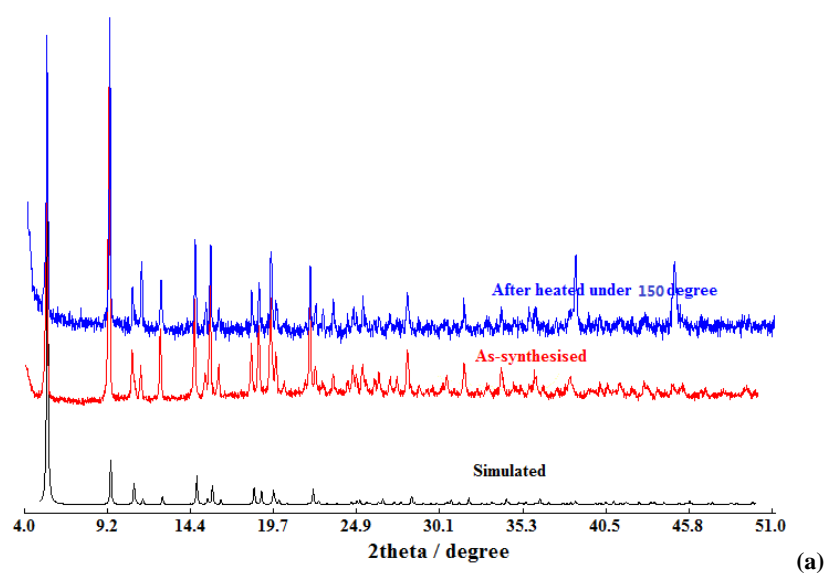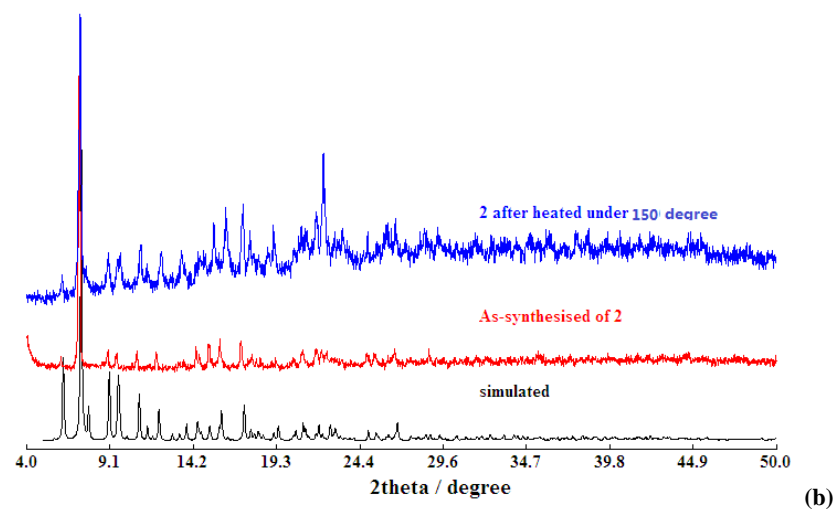

Fig. S2 X-ray powder diffraction patterns (upper) of complexes in comparison with the simulated ones on the basis of the single crystal data (lower): (a) **1**; (b) **2**.
